# Supplementary material for: Increased expression of CELSR3 indicates a poor prognostic factor for Prostate Cancer
Source: PubMed Central journal article supplement (PMC7797646; doi:10.7150/jca.49567), 2021-01-01
Supplement: jcav12p1115s1.pdf [file jcav12p1115s1.pdf]

**Table S1** the sequence of primers.

| <b>Gene</b> | <b>Primer sequence</b> |
|-------------|------------------------|
| CELSR3      |                        |
| Forward     | CCCACCCCAAAGATGTGGAT   |
| Reverse     | GGCTGGTTGTTGTTAGCTGC   |
| GAPDH       |                        |
| Forward     | TCGGAGTCAACGGATTTGGT   |
| Reverse     | TTCCCGTTCTCAGCCTTGAC   |
| CENPE       |                        |
| Forward     | ACTGCTCTCCAGTTTGCCAG   |
| Reverse     | GGTCACCAGCATCCGTGTTA   |
| CENPA       |                        |
| Forward     | TATTGGCCCTACAAGAGGCAG  |
| Reverse     | GCCAGTTGCACATCCTTTGG   |
| CDC20       |                        |
| Forward     | TCGCATCTGGAATGTGTGCT   |
| Reverse     | CGGGATGTGTGACCTTTGAGT  |
| NUF2        |                        |
| Forward     | ACTGTAGGTGAGCGCGAGA    |
| Reverse     | GCAAGACTTCAGGCTTTGGA   |
| ESPL1       |                        |
| Forward     | ACTGGTCAGGCGGTTAAGTC   |
| Reverse     | CTGGAGGGTTGGACAGGAAC   |
| PLK1        |                        |
| Forward     | CCGCAATTACATGAGCGAGC   |
| Reverse     | AGGAGACTCAGGCGGTATGT   |
